# Supplementary material
Source: PubMed Central journal article supplement (PMC5121374)
Supplement: JCM.00790-16_zjm999095190so1.pdf [file JCM.00790-16_zjm999095190so1.pdf]

**Table S1.** Characteristics of the reference genomes and of the cgMLST gene sets of the investigated species.

| Species              | Reference genome                  |                                     | cgMLST schemes                                             |                                                                           |                         |
|----------------------|-----------------------------------|-------------------------------------|------------------------------------------------------------|---------------------------------------------------------------------------|-------------------------|
|                      | Strain ID<br>(NCBI acc. no.)      | No. of genes<br>(genome size in bp) | No. of NCBI RefSeq<br>genome sequences available<br>(date) | No. of target genes analyzed<br>(concatenated size in bp; % of<br>genome) | List of target<br>genes |
| <i>S. aureus</i>     | COL<br>(NC_002951)                | 2,612 (2,809.422)                   | 40 (August 9, 2013)                                        | 1,861 (1,694.861; 60.3)                                                   | Table S2, from<br>(1)   |
| <i>E. coli</i>       | O157:H7 str. Sakai<br>(NC_002695) | 5,230 (5,498.450)                   | 60 (July 30, 2013)                                         | 2,325 (2,261.241; 41.1)                                                   | Table S2                |
| <i>E. faecium</i>    | DO<br>(NC_017960)                 | 2,703 (2,698.137)                   | 3 (May 14, 2013)                                           | 2,057 (1,838.827; 68.2)                                                   | Table S2                |
| <i>P. aeruginosa</i> | PAO1<br>(NC_002516)               | 5,570 (6,264.404)                   | 10 (July 18, 2013)                                         | 3,842 (3,888.805; 62.1)                                                   | Table S2                |

bp, base pair.

**Supplementary References**

1. **Leopold SR, Goering RV, Witten A, Harmsen D, Mellmann A.** 2014. Bacterial whole-genome sequencing revisited: portable, scalable, and standardized analysis for typing and detection of virulence and antibiotic resistance genes. J Clin Microbiol **52**:2365-2370.
