# Supplementary material
Source: PubMed Central journal article supplement (PMC5121374)
Supplement: JCM.00790-16_zjm999095190so2.pdf [file JCM.00790-16_zjm999095190so2.pdf]

**Table S4.** Additionally detected MDR bacteria during interval II (15 Oct 2014 – 15 Apr 2015).

| <b>Bacterial species</b>       | <b>No. of isolates</b> |
|--------------------------------|------------------------|
| <i>Acinetobacter baumannii</i> | 2                      |
| <i>Citrobacter freundii</i>    | 1                      |
| <i>Enterococcus faecalis</i>   | 1                      |
| <i>Enterobacter aerogenes</i>  | 2                      |
| <i>Enterobacter cloacae</i>    | 11                     |
| <i>Hafnia alvei</i>            | 1                      |
| <i>Klebsiella oxytoca</i>      | 1                      |
| <i>Klebsiella pneumoniae</i>   | 25                     |
| <i>Morganella morganii</i>     | 1                      |
| <i>Proteus mirabilis</i>       | 2                      |
| <i>Serratia marcescens</i>     | 1                      |
